# Supplementary material for: Bimatoprost Implant Biodegradation in the Phase 3, Randomized, 20-Month ARTEMIS Studies
Source: PubMed Central journal article supplement (PMC9885540; doi:10.1089/jop.2022.0137), 2023-01-25
Supplement: Suppl_FigS1.pdf [file Suppl_FigS1.pdf]

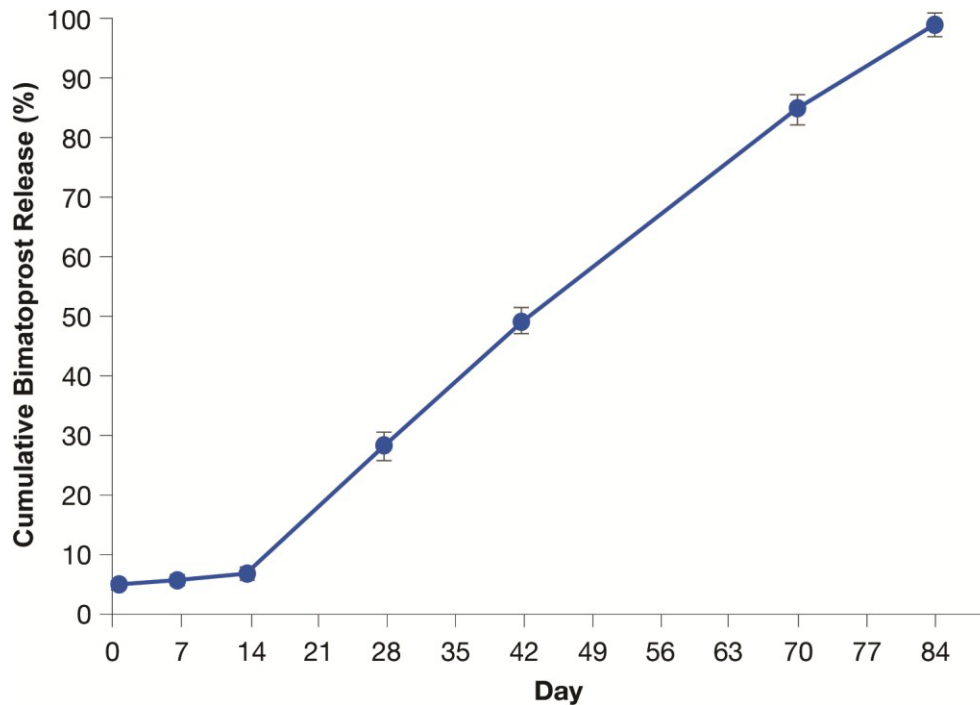

**Supplemental Fig. S1.** In vitro drug release profile of 10- $\mu$ g bimatoprost implant over time. On day 0, implants were placed in 10 mM phosphate-buffered saline solution at pH  $7.4 \pm 0.1$  and incubated at  $32^{\circ}\text{C}$ . Samples of the release media were obtained on days 1, 7, 14, 28, 42, 70, and 84; bimatoprost content of the samples was determined with a reversed phase high performance liquid chromatographic method. Cumulative percentage bimatoprost release was calculated based on the initial bimatoprost content of the implants (10  $\mu$ g). Data shown are means  $\pm$  standard deviation ( $n=6$ ). Republished from Medeiros FA, et al. Phase 3, randomized, 20-month study of bimatoprost implant in open-angle glaucoma and ocular hypertension (ARTEMIS 1). *Ophthalmology*. 2020;127(12):1627–1641 under the terms of the Creative Commons CC-BY-NC-ND license.
